# Supplementary material for: Anti–SARS-CoV-2 Pharmacotherapies Among Nonhospitalized US Veterans, January 2022 to January 2023
Source: PubMed Central journal article supplement (PMC10472184; doi:10.1001/jamanetworkopen.2023.31249), 2023-08-31
Supplement: jamanetwopen-e2331249-s002.pdf [file jamanetwopen-e2331249-s002.pdf]

## **Data Sharing Statement**

Yan. Anti-SARS-CoV-2 Pharmacotherapies Among Nonhospitalized US Veterans, January 2022 to January 2023. *JAMA Netw Open*. Published online August 28, 2023. doi:10.1001/jamanetworkopen.2023.31249

### **Data**

**Data available:** No
